# Supplementary material for: Promoting Long-Term Survival of Insulin-Producing Cell Grafts That Differentiate from Adipose Tissue-Derived Stem Cells to Cure Type 1 Diabetes
Source: PubMed Central journal article supplement (PMC3247284; doi:10.1371/journal.pone.0029706), 2011-12-28

**Figure S1. Insulin release by IPCCs and islets in vitro**

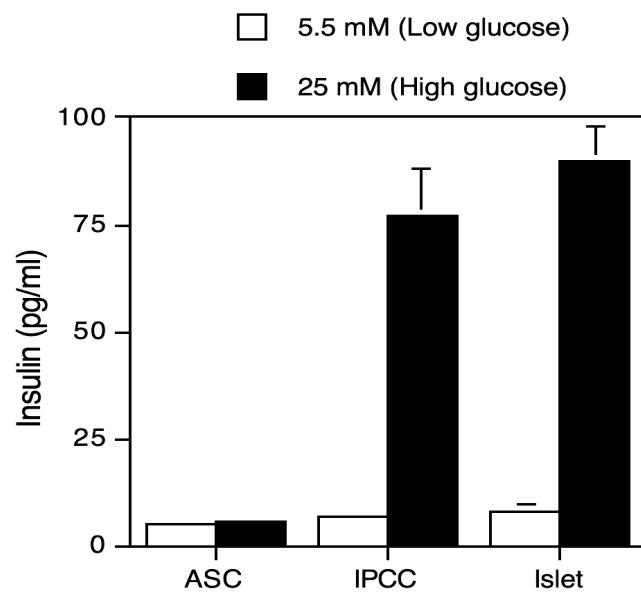

Supplement: pone.0029706.s001.pdf [file pone.0029706.s001.pdf]
