# Supplementary material for: Promoting Long-Term Survival of Insulin-Producing Cell Grafts That Differentiate from Adipose Tissue-Derived Stem Cells to Cure Type 1 Diabetes
Source: PubMed Central journal article supplement (PMC3247284; doi:10.1371/journal.pone.0029706), 2011-12-28
Supplement: pone.0029706.s002.pdf [file pone.0029706.s002.pdf]

**Table S1: Primers for RT-PCR**

| No. | Name           | Sequence 5'--3'             | Product size |
|-----|----------------|-----------------------------|--------------|
| 1   | PDX-1          | ACTTAACCTAGGCGTCGCACAAGA    | 135bp        |
|     |                | GGCATCAGAAGCAGCCTCAAAGTT    |              |
| 2   | GCK            | ACAGAGCCAGGATGGAGG          | 127bp        |
|     |                | TTCAGGCCACGGTCCA            |              |
| 3   | ISL1           | ACAAGCGGTGCAAGGACAAGAAAC    | 154bp        |
|     |                | ACTGGGTTAGCCTGTAAACCACCA    |              |
| 4   | PAX4           | TGTTACAAGACCAGACCACAGCA     | 190bp        |
|     |                | TGCATGCTTCACACTGGTACTCCT    |              |
| 5   | Glut2          | TGTCATCGCCCTCTGCTTC         | 161bp        |
|     |                | TCTTCCGGAATTCTGCAGC         |              |
| 6   | NeuroD1        | ACCTTGCTACTCCAAGACCCAGAA    | 139bp        |
|     |                | TTTGCAGAGCGTCTGTACGAAGGA    |              |
| 7   | SST            | ATGCTGTCCTGCCGTCTC          | 127bp        |
|     |                | TGGCAGCCGCCAGAG             |              |
| 8   | Insulin        | TGGCTTCTTCTACACACCCAAG      | 131bp        |
|     |                | ACAATGCCACGCTTCTGCC         |              |
| 9   | $\beta$ -actin | AGGTCATCACTATTGGCAACGA      | 118bp        |
|     |                | CACTTCATGATGGAATTGAATGTAGTT |              |
